# Supplementary material for: OGT/HIF-2α axis promotes the progression of clear cell renal cell carcinoma and regulates its sensitivity to ferroptosis
Source: PubMed Central journal article supplement — iScience. 2023 Oct 5;26(11):108148. doi: 10.1016/j.isci.2023.108148 (PMC10616330; doi:10.1016/j.isci.2023.108148), 2023-10-05
Supplement: mmc1.pdf [file mmc1.pdf]

**Supplemental information**

**OGT/HIF-2 $\alpha$  axis promotes the progression  
of clear cell renal cell carcinoma  
and regulates its sensitivity to ferroptosis**

**Zhou Yang, Xiyi Wei, Chengjian Ji, Xiaohan Ren, Wei Su, Yichun Wang, Jingwan Zhou, Zheng Zhao, Pengcheng Zhou, Kejie Zhao, Bing Yao, Ninghong Song, and Chao Qin**

**File list:**

1. Figure S1
2. Figure S2
3. Figure S3

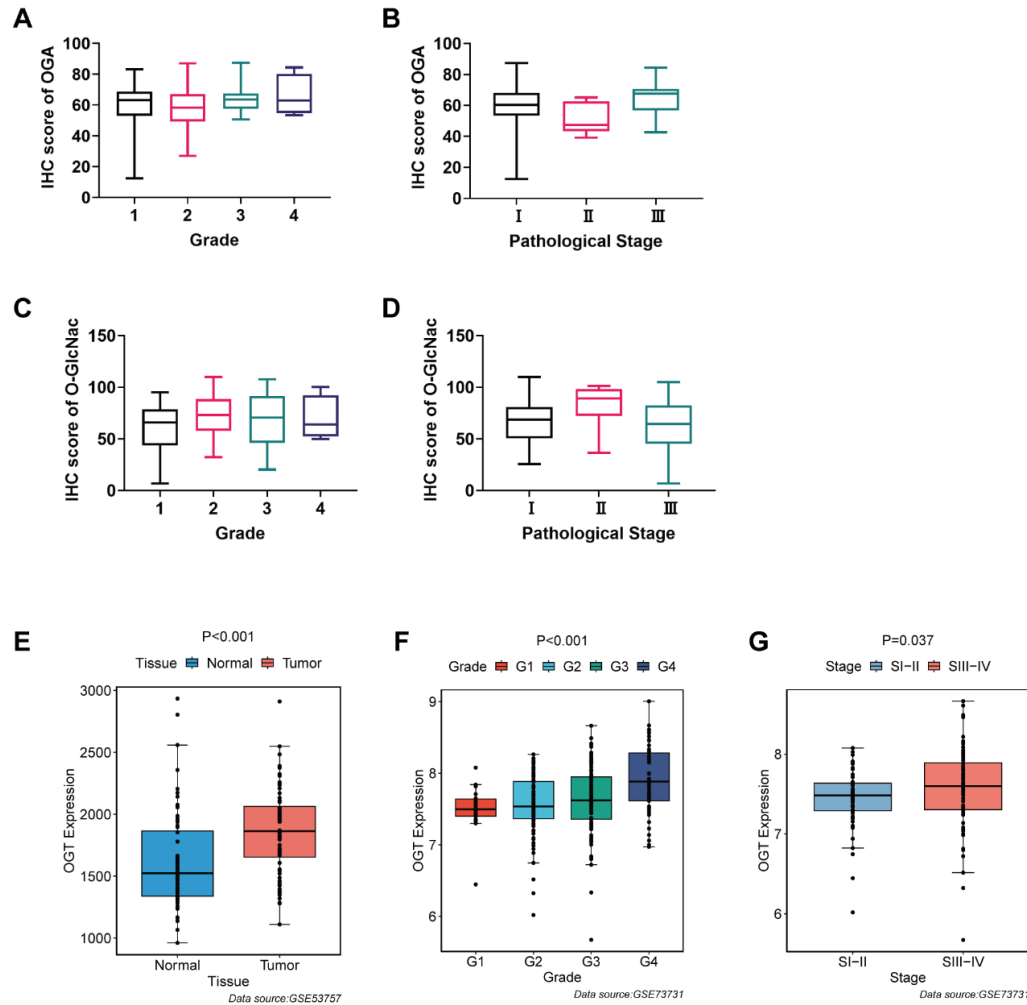

**Figure S1. Expression of OGA and O-GlcNac in ccRCC, related to Figure 1. A. B.**

The expression of OGA in different grades (A) and pathological stages of ccRCC. C.

D. The expression of O-GlcNac in different grades (C) and pathological stages (D) of

ccRCC. E. The expression of OGT in ccRCC (n=72) and normal renal tissues (n=72)

from GSE53757. F. G. The expression of OGT in different grades (F) and pathological

stages (G) of ccRCC from GSE73731 (Grade 1: n=22, Grade 2: n=90, Grade 3: n=95,

Grade 4: n=49); (Stage I-II: n=53, Stage III-IV: n=72). Statistical analysis of the data

from 2 groups was performed using Student's t test. Comparisons among multiple

groups were performed by one-way ANOVA followed by Fisher's LSD test. **Data are**

**represented as mean +/- SD.**

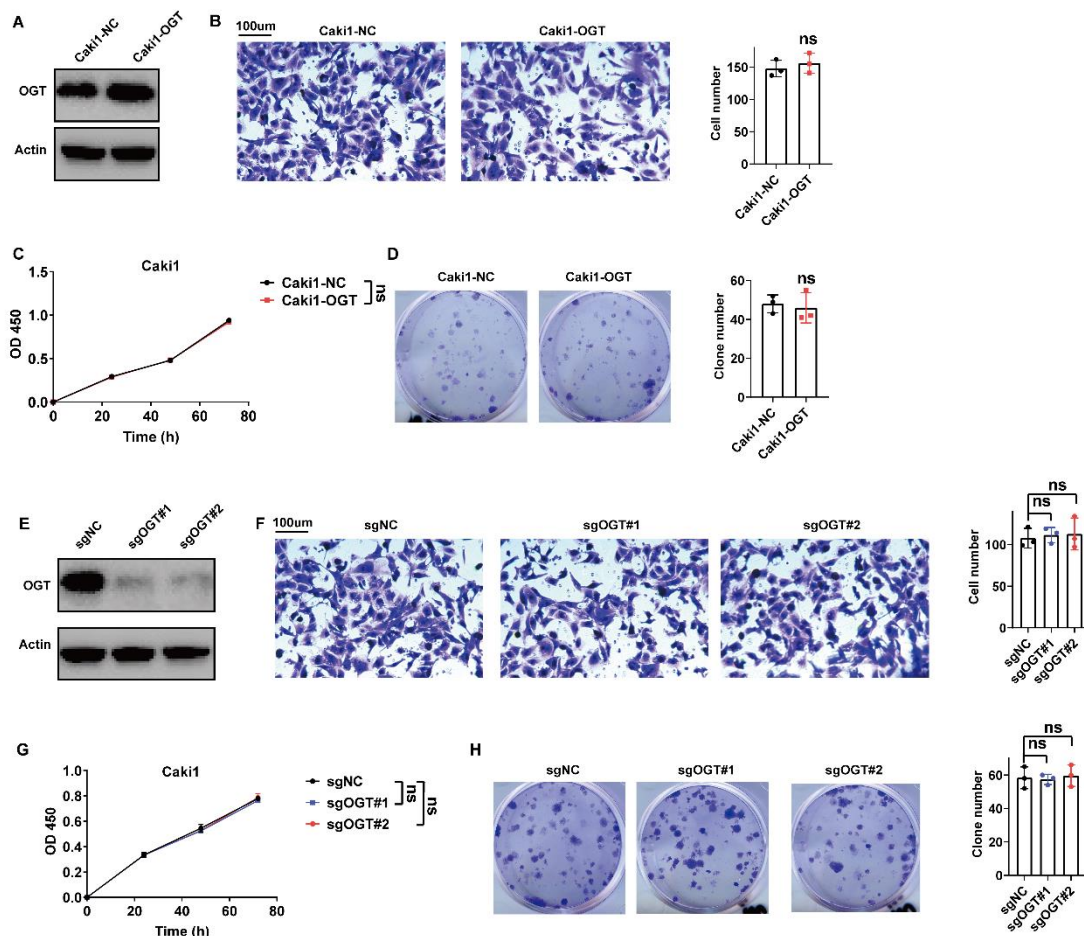

**Figure S2. OGT shows no effect at Caki-1, related to Figure 2.** A. Overexpression of OGT in Caki1 cells validated by Western Blotting analysis. B-D. The invasion (B), proliferation (C), and clone formation (D) of Caki1-NC (Caki1 negative control) and Caki1-OGT (OGT overexpressed Caki1). **Scale bar, 100  $\mu\text{m}$ .** E. Knockout of OGT in Caki1 cells validated by Western Blotting analysis. F-H. The invasion (F), proliferation (G), and clone formation (H) of OGT-depleted and control Caki1 cells. **Scale bar, 100  $\mu\text{m}$ .** Statistical analysis of the data from 2 groups was performed using Student's t test. Comparisons among multiple groups were performed by one-way ANOVA followed by Fisher's LSD test. **Data are represented as mean +/- SD. (*ns*: no significance)**

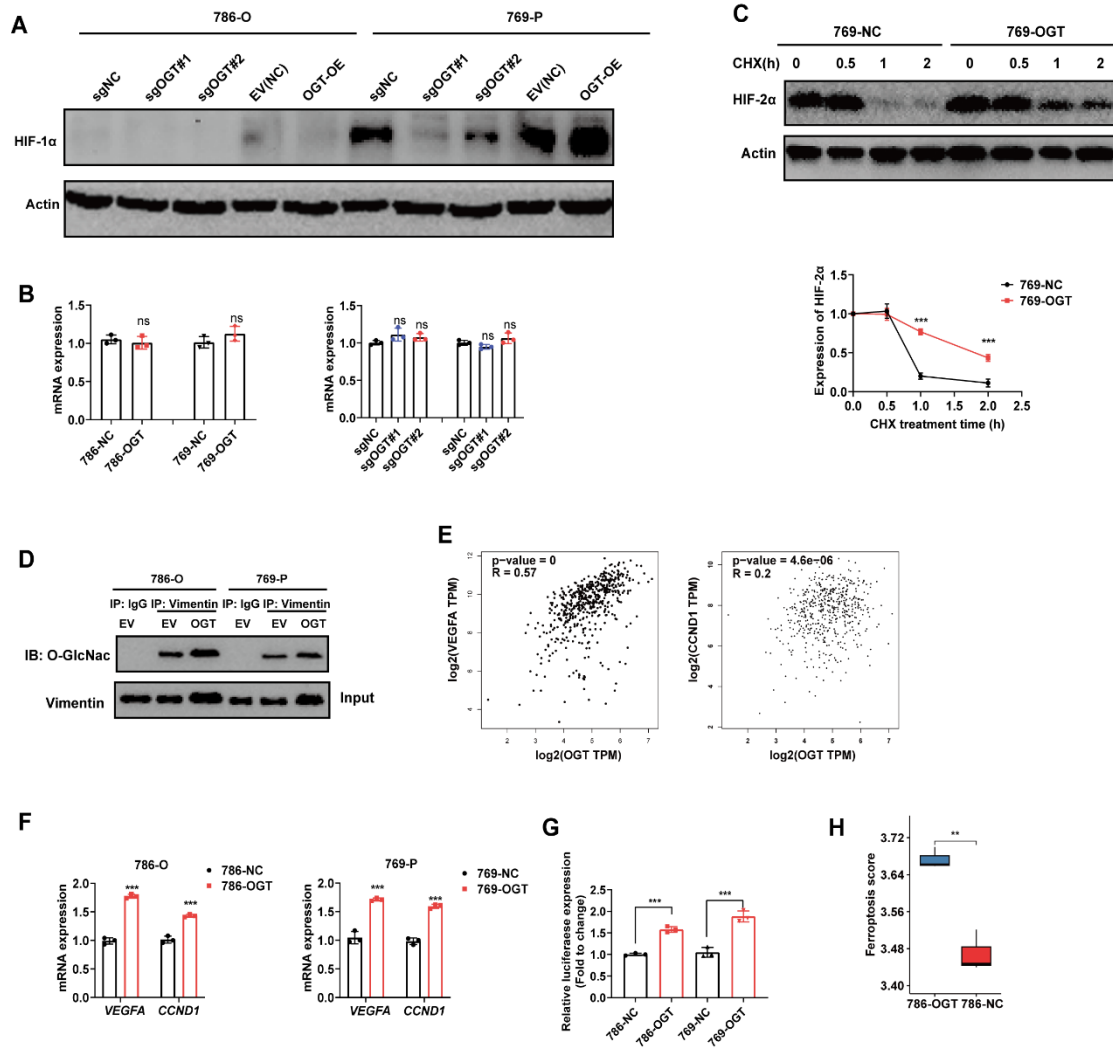

**Figure S3. OGT regulates proteasomal degradation of HIF-2α by direct binding, related to Figure 3.** A. The expression of HIF-1α in 786-O and 769-P cells. B. The mRNA level of HIF-2α measured by RT-qPCR. C. Overexpression of OGT increased the protein stability of HIF-2α. Protein synthesis inhibitor Cycloheximide (CHX, 20μg/ml). D. O-GlcNac modification of Vimentin in 786-O cells detected by Co-IP analysis. E. Correlation between OGT and HIF-2α targeted genes at the transcriptional level in the TCGA database (TPM: transcripts per million). F. Overexpression of OGT increased the mRNA level of HIF-2α targeted genes (*VEGFA* and *CCND1*). G. Overexpression of OGT enhanced the transcripti onal activity of HIF-2α. H. Ferroptosis

score of 786-OGT and 786-NC cells analyzed by ssGSEA algorithm. Data are represented as mean +/- SD. Statistical analysis of the data from 2 groups was performed using Student's t test. Comparisons among multiple groups were performed by one-way ANOVA followed by Fisher's LSD test. (\*\* $P < 0.001$ , *ns*: no significance)
